# Supplementary material for: The Dynamics of microRNA Transcriptome in Bovine Corpus Luteum during Its Formation, Function, and Regression
Source: Front Genet. 2017 Dec 15;8:213. doi: 10.3389/fgene.2017.00213 (PMC5736867; doi:10.3389/fgene.2017.00213)
Supplement: Supplementary file 4 [file Table4.XLSX]

## Sheet: Table 4A and B
# of DE miRs: 42	# DE miRs: 19	# DE miRs: 7	# DE miRs: 12	# DEmiRs: 24	# DE miRs: 11	# miRs: 21
CL classes: eCL vs mCL,vs lCL, vs rCL	CL classes: eCL vsmCL and eCL vs lCL	CL classes: eCL vs mCL and eCL vs rCL	CL classes: eCL vs lCL and eCL vs rCL	CL classes: eCL vs mCL	CL classes: eCL vs lCL	CL classes: eCL vs rCL
bta-miR-1307	bta-miR-21-5p	bta-miR-409b	bta-miR-451	bta-miR-6529a	bta-let-7a-5p	bta-miR-125b
bta-miR-191	bta-miR-221	bta-miR-142-5p	bta-miR-30e-5p	bta-miR-103	bta-miR-452	bta-miR-29b
bta-miR-10b	bta-miR-365-3p	bta-miR-543	bta-miR-2284x	bta-miR-126-3p	bta-miR-185	bta-miR-199b
bta-miR-15a	bta-miR-3600	bta-miR-484	bta-miR-2285f	bta-miR-24-3p	bta-miR-144	bta-miR-6120-3p
bta-miR-381	bta-miR-193a-5p	bta-miR-23a	bta-miR-148b	bta-miR-410	bta-miR-151-5p	bta-miR-152
bta-miR-125a	bta-miR-3431	bta-miR-150	bta-let-7g	bta-miR-455-3p	bta-let-7b	bta-miR-143
bta-miR-30c	bta-miR-33a	bta-miR-140	bta-miR-744	bta-miR-1839	bta-miR-382	bta-miR-532
bta-miR-210	bta-miR-34a		bta-miR-499	bta-miR-101	bta-miR-1271	bta-miR-218
bta-miR-450b	bta-miR-424-3p		bta-miR-212	bta-miR-195	bta-miR-29a	bta-miR-29e
bta-miR-20a	bta-miR-27b		bta-miR-708	bta-miR-31	bta-miR-7859	bta-miR-2957
bta-miR-92b	bta-miR-106b		bta-miR-3596	bta-miR-503-3p	bta-miR-193a-3p	bta-miR-199c
bta-miR-493	bta-miR-339a		bta-miR-154b	bta-miR-149-5p		bta-miR-27a-3p
bta-miR-6119-5p	bta-miR-424-5p			bta-miR-370		bta-miR-199a-5p
bta-miR-17-5p	bta-miR-222			bta-miR-16b		bta-miR-199a-3p
bta-miR-107	bta-miR-30f			bta-miR-2892		bta-miR-3604
bta-miR-139	bta-miR-22-5p			bta-miR-495		bta-miR-362-5p
bta-miR-2478	bta-miR-2354			bta-miR-1197		bta-miR-378
bta-miR-1248	bta-miR-361			bta-let-7i		bta-miR-99a-5p
bta-miR-296-3p	bta-miR-181b			bta-miR-32		bta-miR-145
bta-miR-182				bta-miR-98		bta-miR-214
bta-miR-26a				bta-miR-151-3p		bta-let-7c
bta-miR-29c				bta-miR-339b
bta-miR-181a				bta-miR-155
bta-miR-1260b				bta-miR-126-5p
bta-miR-96
bta-miR-2898
bta-miR-450a
bta-miR-202
bta-miR-183
bta-let-7e
bta-miR-146a
bta-miR-7
bta-miR-7857
bta-miR-148a
bta-miR-26c
bta-miR-10a
bta-miR-132
bta-miR-26b
bta-miR-574
bta-miR-22-3p
bta-miR-30a-5p
bta-miR-433
